# Supplementary material
Source: HighWire-hosted journal article supplement (https://bmjopen.bmj.com/content/11/12/e052593)

### Supplementary file 3: Content analysis process

The flow diagram below details the qualitative content analysis coding process used for the Nominal Group Technique statements which reached consensus.

Steps taken from Moretti et al., (2011)

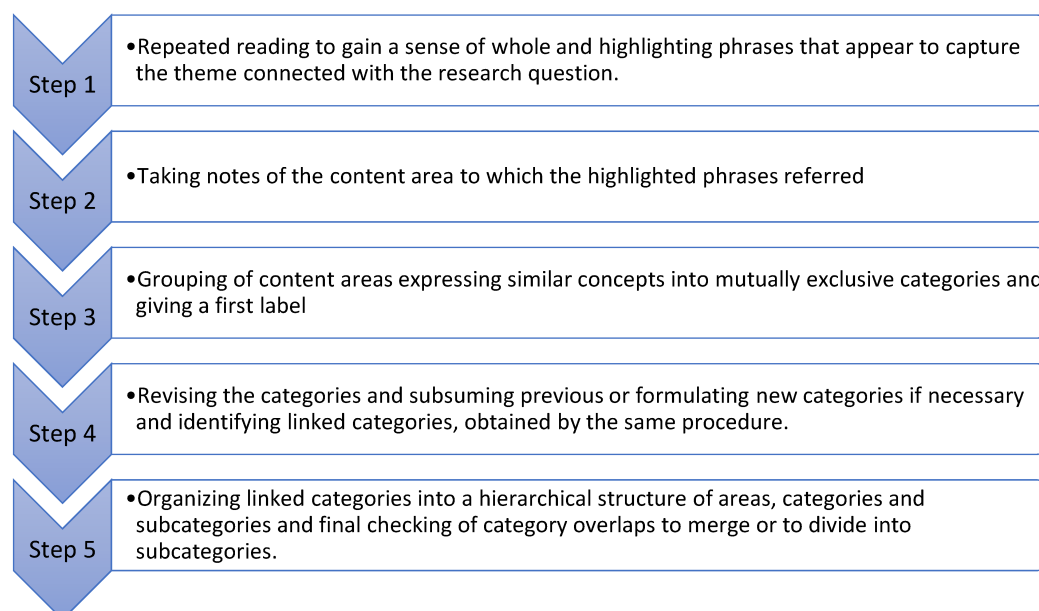

Supplement: inline-supplementary-material-3 [file inline-supplementary-material-3.pdf]
